# Supplementary material
Source: publisher site journal article supplement (https://www.spandidos-publications.com/6099/downloadSupplementary)

Figure S1. Cell viability of TC-1 cells after treatment with a gradient concentration of AIL at 12 h ( $IC_{50}=512.047\pm 3.502 \mu M$ ), 24 h ( $IC_{50}=168.551\pm 3.502 \mu M$ ), 36 h ( $IC_{50}=122.912\pm 4.456 \mu M$ ), and 48 h ( $IC_{50}=80.945\pm 4.283 \mu M$ ) by MTT assay. AIL, ailanthone.

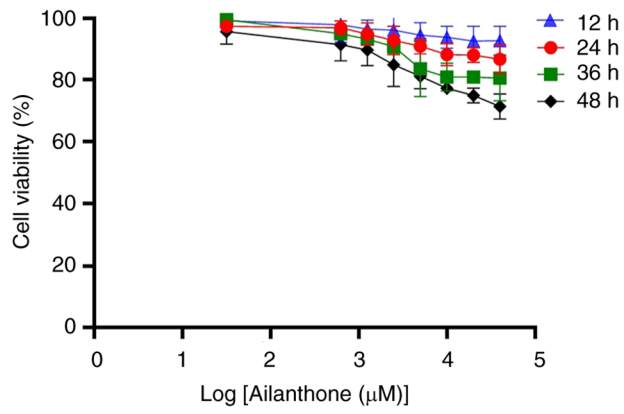

Supplement: Supplementary file 1 [file downloadSupplementary]
